# Supplementary material
Source: MDPI journal article supplement (https://www.mdpi.com/2073-4395/12/8/1885)
Supplement: s1 [file s1]

|            |          |               |                  | Score sensory |        |         |      |         |            |         |              |  |
|------------|----------|---------------|------------------|---------------|--------|---------|------|---------|------------|---------|--------------|--|
| Repetition | altitude | face          | post harvest     | Aroma         | Flavor | Acidity | Body | General | aftertaste | Balance | global score |  |
| 1          | 950      | Afternoon sun | Natural          | 7.5           | 7.5    | 7.5     | 7    | 7       | 6.5        | 7       | 80           |  |
| 2          | 950      | Afternoon sun | Natural          | 7             | 7.5    | 7       | 7    | 7       | 7          | 7       | 79.5         |  |
| 3          | 950      | Afternoon sun | Natural          | 7.5           | 7      | 7.5     | 7    | 7       | 7.5        | 7       | 80.5         |  |
| 4          | 950      | Afternoon sun | Natural          | 7             | 7      | 7       | 7    | 7       | 7          | 7       | 79           |  |
| 5          | 950      | Afternoon sun | Natural          | 7.5           | 7.5    | 7.5     | 7.5  | 7.5     | 7          | 7.5     | 82           |  |
| 6          | 950      | Afternoon sun | Natural          | 7.5           | 7.25   | 7.25    | 7    | 7.25    | 7          | 7       | 80.25        |  |
| 7          | 950      | Afternoon sun | Natural          | 7             | 7.5    | 7.25    | 7.25 | 7       | 7          | 7       | 80           |  |
| 1          | 950      | Morning sun   | cherry with peel | 8             | 7      | 7       | 7.5  | 7       | 6.5        | 7       | 80           |  |
| 2          | 950      | Morning sun   | cherry with peel | 7             | 7.5    | 7       | 7.5  | 7       | 7          | 7       | 80           |  |
| 3          | 950      | Morning sun   | cherry with peel | 7.75          | 7.5    | 7       | 7.5  | 7.5     | 7          | 7       | 81.25        |  |
| 4          | 950      | Morning sun   | cherry with peel | 7             | 7.5    | 7.75    | 7    | 7.5     | 7.5        | 7       | 81.25        |  |
| 5          | 950      | Morning sun   | cherry with peel | 7.5           | 7      | 7.5     | 7    | 7.5     | 7          | 7.5     | 81           |  |
| 6          | 950      | Morning sun   | cherry with peel | 7.5           | 7.25   | 7.75    | 7    | 7.5     | 7.75       | 7.5     | 82.25        |  |
| 7          | 950      | Morning sun   | cherry with peel | 7             | 7.5    | 7.25    | 7.25 | 7       | 7          | 7       | 80           |  |
| 1          | 950      | Afternoon sun | cherry with peel | 7.5           | 7.5    | 7       | 6.5  | 7       | 7          | 7       | 79.5         |  |
| 2          | 950      | Afternoon sun | cherry with peel | 7             | 7      | 7       | 7    | 7       | 7          | 7       | 79           |  |
| 3          | 950      | Afternoon sun | cherry with peel | 7.5           | 7.5    | 7.5     | 7    | 7       | 7          | 7       | 80.5         |  |
| 4          | 950      | Afternoon sun | cherry with peel | 7             | 7.75   | 7       | 7.5  | 7       | 7.5        | 7       | 80.75        |  |
| 5          | 950      | Afternoon sun | cherry with peel | 7.5           | 7.5    | 7.5     | 7.5  | 7.5     | 7          | 7.5     | 82           |  |
| 6          | 950      | Afternoon sun | cherry with peel | 7.5           | 7.25   | 7.25    | 7    | 7.25    | 7.5        | 7.25    | 81           |  |
| 1          | 950      | Afternoon sun | Natural          | 7             | 7      | 7       | 7    | 7       | 6.75       | 7       | 78.75        |  |
| 2          | 950      | Morning sun   | Natural          | 7             | 7      | 7       | 7    | 7       | 7          | 7       | 79           |  |
| 3          | 950      | Morning sun   | Natural          | 7.5           | 7.25   | 7.25    | 7.5  | 7.5     | 7          | 7       | 81           |  |
| 4          | 950      | Morning sun   | Natural          | 7.5           | 7      | 7       | 7    | 7       | 7          | 7       | 79.5         |  |
| 5          | 950      | Morning sun   | Natural          | 7.5           | 7.5    | 7.5     | 7.5  | 7.5     | 7.5        | 7.5     | 82.5         |  |
| 6          | 950      | Morning sun   | Natural          | 7.5           | 7.25   | 7.75    | 7    | 7.5     | 7.75       | 7.5     | 82.25        |  |
| 7          | 950      | Morning sun   | Natural          | 7             | 7.5    | 7.5     | 7    | 7       | 7          | 7       | 80           |  |
| 7          | 950      | Morning sun   | cherry with peel | 7             | 7.5    | 7.5     | 7.25 | 7       | 7          | 7       | 80.25        |  |
| 1          | 1050     | Afternoon sun | Natural          | 7.5           | 8      | 7       | 7    | 7       | 7          | 7       | 80.5         |  |
| 2          | 1050     | Afternoon sun | Natural          | 7             | 7      | 7.5     | 7    | 7       | 7.75       | 7       | 80.25        |  |
| 3          | 1050     | Afternoon sun | Natural          | 7             | 7.5    | 7.75    | 7    | 7.25    | 7          | 7       | 80.5         |  |

[illegible]

|             |           |               |                  |      |       |       |       |      |      |      |               |       |        |
|-------------|-----------|---------------|------------------|------|-------|-------|-------|------|------|------|---------------|-------|--------|
| 2           | 1150      | Morning sun   | cherry with peel | 7.5  | 7.25  | 7.25  | 7     | 7    | 7    | 7    | 80            |       |        |
| 3           | 1150      | Morning sun   | cherry with peel | 7    | 7.5   | 7.5   | 7.5   | 7.5  | 7    | 7.5  | 81.5          |       |        |
| 4           | 1150      | Morning sun   | cherry with peel | 7    | 7     | 7     | 7     | 7    | 7    | 7    | 79            |       |        |
| 5           | 1150      | Morning sun   | cherry with peel | 7.5  | 7.5   | 7.5   | 7.5   | 7    | 7.5  | 7.5  | 82            |       |        |
| 6           | 1150      | Morning sun   | cherry with peel | 7.5  | 7.5   | 7.5   | 7.5   | 7    | 7.5  | 7.5  | 82            |       |        |
| 7           | 1150      | Morning sun   | cherry with peel | 7    | 7.5   | 7.5   | 7.25  | 7    | 7    | 7.25 | 80.5          |       |        |
| 1           | 1150      | Afternoon sun | cherry with peel | 8    | 7     | 7.5   | 7.5   | 7    | 7    | 7    | 81            |       |        |
| 2           | 1150      | Afternoon sun | cherry with peel | 7.5  | 7.5   | 7     | 7.5   | 7    | 7    | 7    | 80.5          |       |        |
| 3           | 1150      | Afternoon sun | cherry with peel | 7.5  | 7.5   | 7     | 7     | 7.5  | 7    | 7.5  | 81            |       |        |
| 4           | 1150      | Afternoon sun | cherry with peel | 7    | 7     | 7     | 7     | 7.25 | 7.5  | 7.5  | 80.25         |       |        |
| 5           | 1150      | Afternoon sun | cherry with peel | 7.5  | 8     | 7.25  | 7.25  | 7.5  | 7.5  | 7.5  | 82.5          |       |        |
| 6           | 1150      | Afternoon sun | cherry with peel | 7.25 | 7.25  | 7.5   | 7.25  | 7.25 | 7    | 7.25 | 80.75         |       |        |
| 7           | 1150      | Afternoon sun | cherry with peel | 7.5  | 7.5   | 7.5   | 7.5   | 7.25 | 7    | 7.25 | 81.5          |       |        |
| 1           | 1150      | Morning sun   | Natural          | 7.5  | 7     | 7.5   | 7     | 6.5  | 7    | 7    | 79.5          |       |        |
| 2           | 1150      | Morning sun   | Natural          | 7    | 7     | 7     | 7     | 7    | 7    | 7    | 79            |       |        |
| 3           | 1150      | Morning sun   | Natural          | 7    | 7     | 7     | 7     | 7    | 7    | 7    | 79            |       |        |
| 4           | 1150      | Morning sun   | Natural          | 7    | 7     | 7     | 7     | 7    | 7    | 7    | 79            |       |        |
| 5           | 1150      | Morning sun   | Natural          | 7.5  | 7.5   | 7.5   | 7     | 7    | 7    | 7    | 80.5          |       |        |
| 6           | 1150      | Morning sun   | Natural          | 7    | 7.25  | 7     | 7.25  | 7.5  | 7    | 7    | 80            |       |        |
| 7           | 1150      | Morning sun   | Natural          | 7    | 6.5   | 7     | 6.5   | 7    | 6.5  | 7    | 77.5          |       |        |
|             |           |               |                  |      |       |       |       |      |      |      |               |       |        |
|             |           |               | Grain Size       |      |       |       |       |      |      |      | Grain defects |       |        |
|             | face      | altitude      | P19              | P18  | P17   | P16   | P15   | P14  | P13  | P12  | Brocade       | Shell | Chocho |
| Natural     | Afternoon | 900           | 0.38             | 1.3  | 18.9  | 41.88 | 24.12 | 7.03 | 2.8  | 0.87 | 0.98          | 0.76  | 0.21   |
| cherry with | Afternoon | 900           | 0.62             | 2.67 | 13.27 | 47.07 | 23.03 | 6.62 | 3.37 | 1.13 | 0.92          | 0.67  | 0.1    |
| Natural     | Afternoon | 1050          | 0.17             | 2.12 | 20.08 | 40.86 | 24.63 | 5.54 | 3.56 | 1.93 | 0.31          | 0.28  | 0.15   |
| cherry with | Afternoon | 1050          | 0.27             | 2.19 | 15.72 | 36.43 | 30.07 | 7.85 | 3.77 | 2.13 | 0.6           | 0.51  | 0      |
| Natural     | Afternoon | 1150          | 0.05             | 1.27 | 18.91 | 42.89 | 24.63 | 7.13 | 3.14 | 0.84 | 0.33          | 0.73  | 0      |
| cherry with | Afternoon | 1150          | 0                | 1.87 | 16.03 | 35.61 | 31.53 | 9.41 | 2.57 | 0.92 | 0.29          | 1.5   | 0.07   |
| cherry with | Morning s | 900           | 0                | 3.92 | 21.96 | 39.76 | 25.17 | 4.89 | 1.47 | 0.38 | 0.97          | 0.88  | 0.1    |
| Natural     | Morning s | 900           | 0.28             | 2.9  | 18.54 | 38.06 | 22.47 | 5.74 | 4.37 | 1.99 | 0.94          | 1.44  | 0.17   |
| cherry with | Morning s | 1050          | 0.36             | 2.24 | 17.99 | 36.17 | 28.33 | 9.35 | 3.25 | 1.05 | 0.42          | 0.23  | 0.23   |
| Natural     | Morning s | 1050          | 0.26             | 2.42 | 14.89 | 36.39 | 22.5  | 8.33 | 4.1  | 4.6  | 0.82          | 0.38  | 0.21   |

|             |           |      |      |      |       |       |       |      |      |      |      |      |      |
|-------------|-----------|------|------|------|-------|-------|-------|------|------|------|------|------|------|
| cherry with | Morning s | 1150 | 0.21 | 3.43 | 21.8  | 32.65 | 25.14 | 9.6  | 3.03 | 1.66 | 0.36 | 1.77 | 0    |
| Natural     | Morning s | 1150 | 0.24 | 2.79 | 20.77 | 36.14 | 24.68 | 6.75 | 4.39 | 1.72 | 0.2  | 0.97 | 0.27 |
